# Supplementary material for: Margin of Stability May Be Larger and Less Variable during Treadmill Walking Versus Overground
Source: MDPI journal article supplement (doi:10.3390/biomechanics1010009), 2021-05-03
Supplement: s1 [file s1]

Archive with 1 entries (1 files):
- SupplementalData_1_04062021.pdf
